# Supplementary material for: Redox-fixable manipulation of planar chirality in late transition metal sandwich compounds; a 1,1′-diphosphacobaltocene/1,1′-diphosphacobaltocenium salt couple
Source: Royal Society of Chemistry journal article supplement (doi:10.1039/c1cc15195a), 2011-01-01

Boltzmann calculation for the equilibrium ratio of *rac-2* to *meso-2*:

The experiments were performed in duplicate and confirmed to be reversible with temperature:

20mM complex was dissolved in in 0.4 mL *d*-toluene, with the *rac-2* to *meso-2* ratio being determined by integration of the phospholyl ligand C-Methyl groups in the negative chemical shift range of the spectrum.

bisphosphacobaltocène TBS

20mg in 0,4mL Toluene-d8

quantification using integrals at -16,7 (meso) and -8,3 (rac)

| T (°C) | T (K) | 1/T        | experience 1 |      |           |           |          |               | experience 2 |      |           |          |          |               |
|--------|-------|------------|--------------|------|-----------|-----------|----------|---------------|--------------|------|-----------|----------|----------|---------------|
|        |       |            | meso         | rac  | meso norm | rac norm  | rac/meso | ln (rac/meso) | meso         | rac  | meso norm | rac norm | rac/meso | ln (rac/meso) |
| 17     | 290   | 0,00344828 | 1            | 10,2 | 8,9285714 | 91,071429 | 10,2     | 2,32238772    | 1            | 9,4  | 9,6153846 | 90,38462 | 9,4      | 2,240709689   |
| 30     | 303   | 0,00330033 | 1            | 7,8  | 11,363636 | 88,636364 | 7,8      | 2,054123734   | 1            | 8,45 | 10,582011 | 89,41799 | 8,45     | 2,134166441   |
| 50     | 323   | 0,00309598 | 1            | 7,3  | 12,048193 | 87,951807 | 7,3      | 1,987874348   | 1            | 7,1  | 12,345679 | 87,65432 | 7,1      | 1,960094784   |
| 67     | 340   | 0,00294118 | 1            | 5,9  | 14,492754 | 85,507246 | 5,9      | 1,774952351   | 1            | 6,4  | 13,513514 | 86,48649 | 6,4      | 1,85629799    |
| 80     | 353   | 0,00283286 | 1            | 5,5  | 15,384615 | 84,615385 | 5,5      | 1,704748092   | 1            | 5,85 | 14,59854  | 85,40146 | 5,85     | 1,766441661   |
| 88     | 361   | 0,00277008 | 1            | 5,25 | 16        | 84        | 5,25     | 1,658228077   | 1            | 5,55 | 15,267176 | 84,73282 | 5,55     | 1,713797928   |

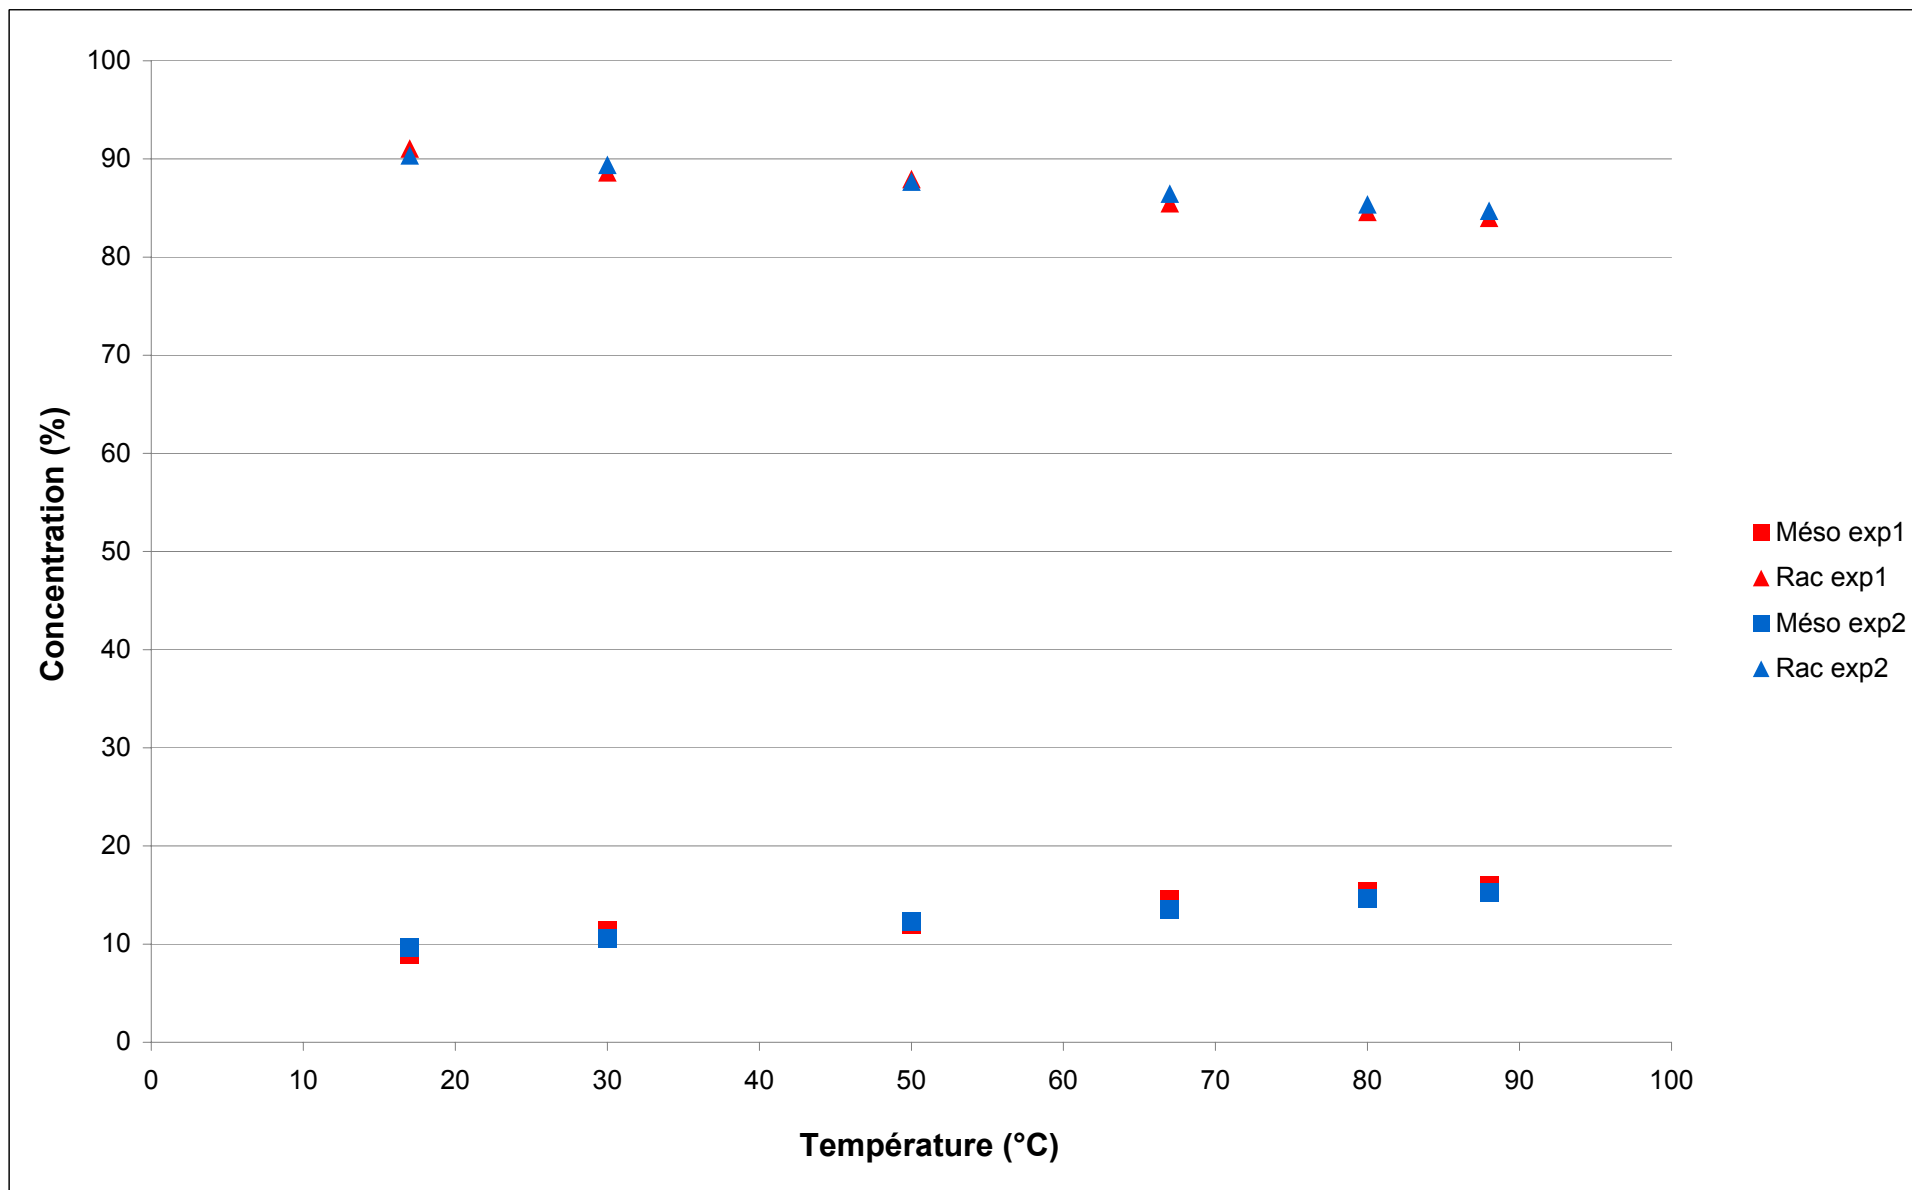

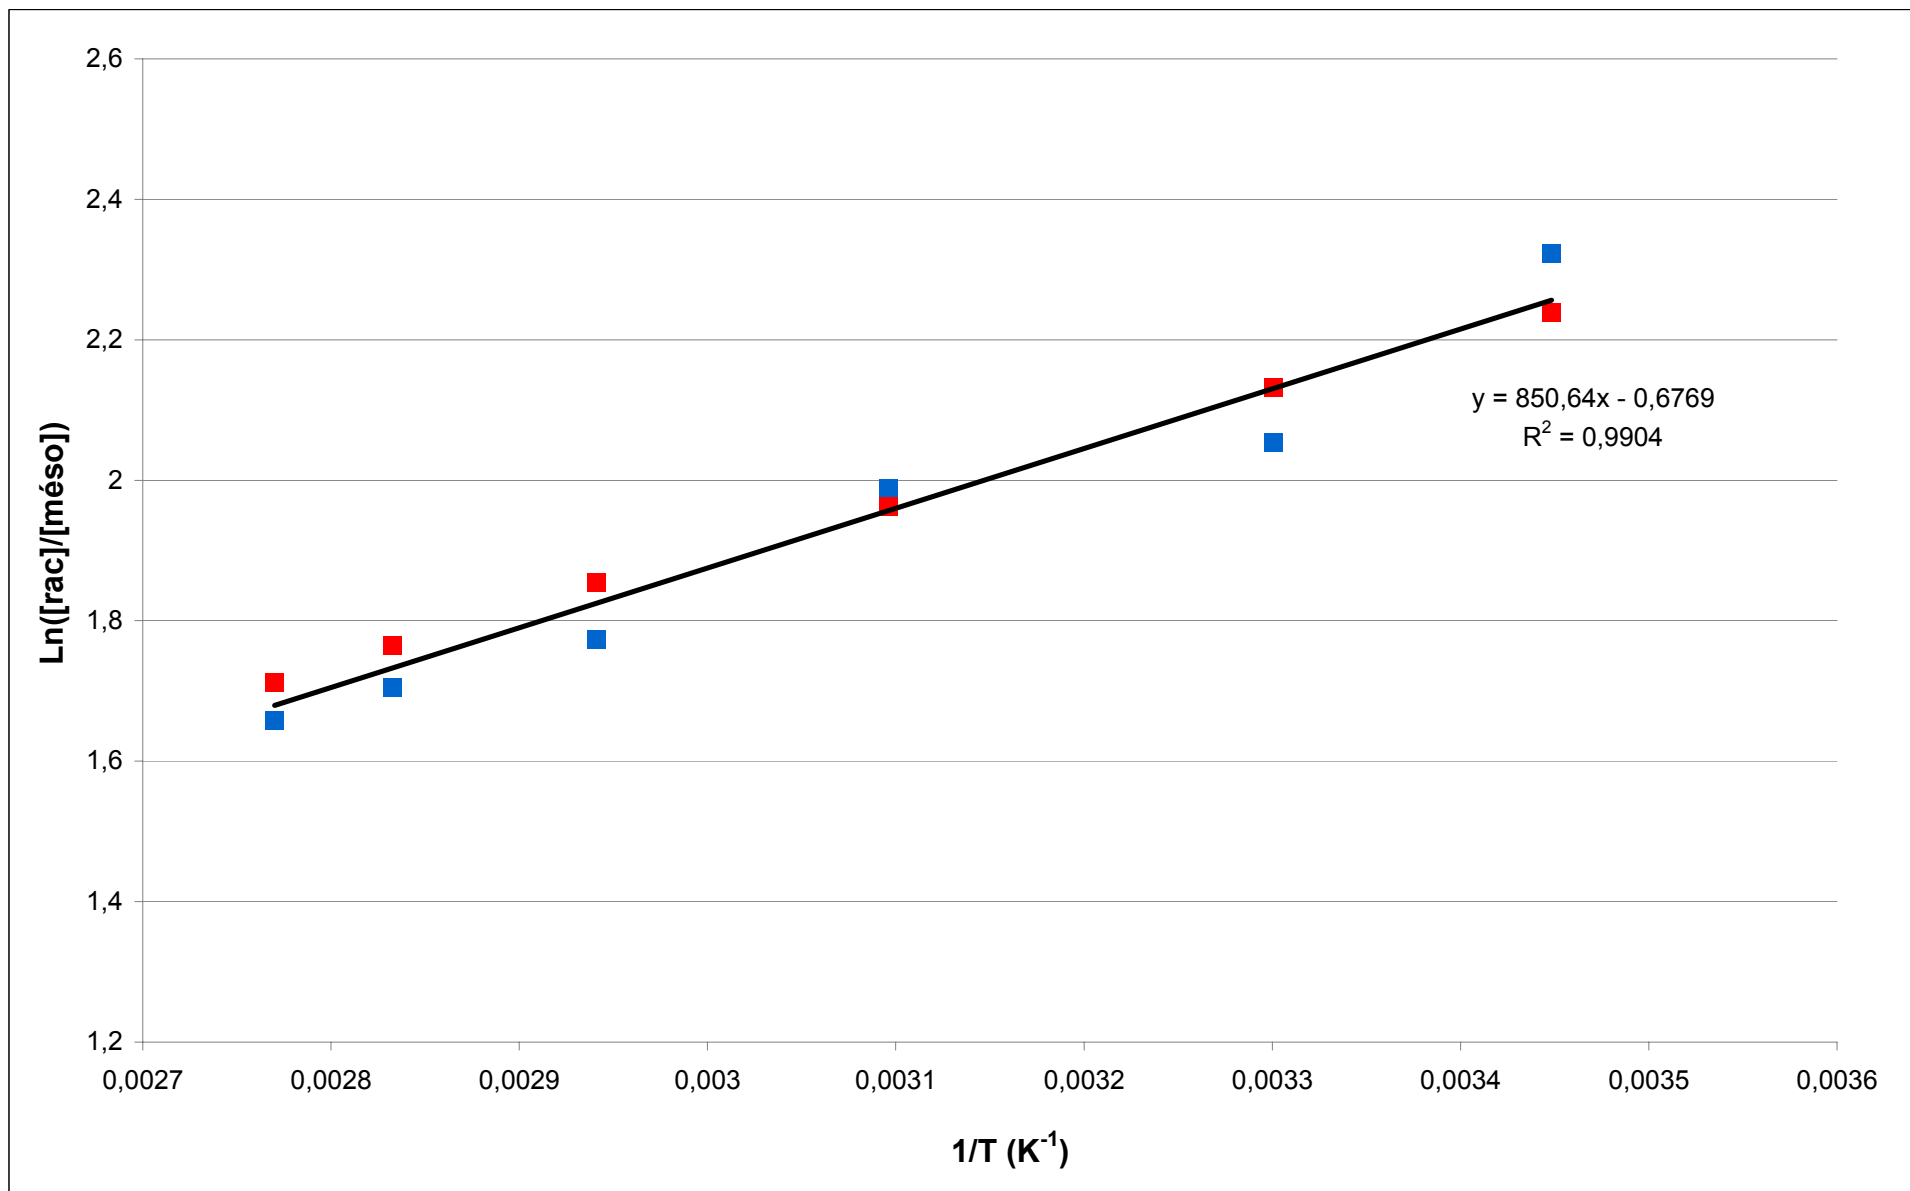

Supplement: c1cc15195a.pdf [file c1cc15195a.pdf]
