# Supplementary material for: Redox-fixable manipulation of planar chirality in late transition metal sandwich compounds; a 1,1′-diphosphacobaltocene/1,1′-diphosphacobaltocenium salt couple
Source: Royal Society of Chemistry journal article supplement (doi:10.1039/c1cc15195a), 2011-01-01
Supplement: c1cc15195a_2.pdf [file c1cc15195a_2.pdf]

Molecule 2,2'-bisTBS-3,3',4,4'-tetraMe-1,1'-diphosphacobaltocene meso-2.

Software. Gaussian G03W

Functionnal B3LYP

Bases H/C/Si/P 6-311+g\*\*  
Co LANL2DZ

Calculation opt (scf=tight)  
Pop=full, nbo  
Freq

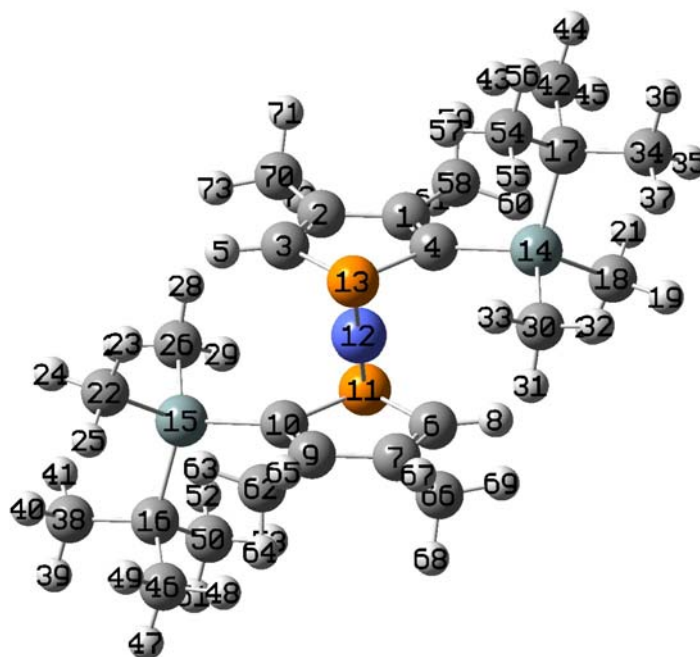

59meso.txt

Optimisation

| Item                 | Value    | Threshold | Converged? |
|----------------------|----------|-----------|------------|
| Maximum Force        | 0.000021 | 0.000450  | YES        |
| RMS Force            | 0.000004 | 0.000300  | YES        |
| Maximum Displacement | 0.001796 | 0.001800  | YES        |
| RMS Displacement     | 0.000334 | 0.001200  | YES        |

Predicted change in Energy=-5.275710D-08  
Optimization completed.  
-- Stationary point found.

Géométrie

Input orientation:

| Center Number | Atomic Number | Atomic Type | Coordinates (Angstroms) |           |           |
|---------------|---------------|-------------|-------------------------|-----------|-----------|
|               |               |             | X                       | Y         | Z         |
| 1             | 6             | 0           | -0.975574               | 1.794981  | -0.741816 |
| 2             | 6             | 0           | -0.980625               | 1.817916  | 0.714295  |
| 3             | 6             | 0           | 0.310173                | 1.822137  | 1.244077  |
| 4             | 6             | 0           | 0.321345                | 1.859537  | -1.310294 |
| 5             | 1             | 0           | 0.513564                | 1.790868  | 2.306222  |
| 6             | 6             | 0           | -0.310173               | -1.822137 | -1.244077 |
| 7             | 6             | 0           | 0.980625                | -1.817916 | -0.714295 |
| 8             | 1             | 0           | -0.513564               | -1.790868 | -2.306222 |
| 9             | 6             | 0           | 0.975574                | -1.794981 | 0.741816  |
| 10            | 6             | 0           | -0.321345               | -1.859537 | 1.310294  |
| 11            | 15            | 0           | -1.573482               | -1.790695 | 0.015554  |
| 12            | 27            | 0           | 0.000000                | 0.000000  | 0.000000  |
| 13            | 15            | 0           | 1.573482                | 1.790695  | -0.015554 |
| 14            | 14            | 0           | 0.838981                | 2.106377  | -3.112648 |
| 15            | 14            | 0           | -0.838981               | -2.106377 | 3.112648  |
| 16            | 6             | 0           | -0.753161               | -3.988066 | 3.561296  |
| 17            | 6             | 0           | 0.753161                | 3.988066  | -3.561296 |
| 18            | 6             | 0           | -0.216123               | 1.119775  | -4.342739 |
| 19            | 1             | 0           | 0.304551                | 1.053167  | -5.302833 |
| 20            | 1             | 0           | -0.380220               | 0.099284  | -3.986692 |
| 21            | 1             | 0           | -1.193725               | 1.568584  | -4.534318 |
| 22            | 6             | 0           | 0.216123                | -1.119775 | 4.342739  |
| 23            | 1             | 0           | 0.380220                | -0.099284 | 3.986692  |
| 24            | 1             | 0           | -0.304551               | -1.053167 | 5.302833  |
| 25            | 1             | 0           | 1.193725                | -1.568584 | 4.534318  |
| 26            | 6             | 0           | -2.626346               | -1.517682 | 3.311173  |
| 27            | 1             | 0           | -3.000079               | -1.754509 | 4.311957  |
| 28            | 1             | 0           | -2.698081               | -0.435202 | 3.185146  |
| 29            | 1             | 0           | -3.301644               | -1.978839 | 2.586602  |
| 30            | 6             | 0           | 2.626346                | 1.517682  | -3.311173 |
| 31            | 1             | 0           | 2.698081                | 0.435202  | -3.185146 |
| 32            | 1             | 0           | 3.000079                | 1.754509  | -4.311957 |
| 33            | 1             | 0           | 3.301644                | 1.978839  | -2.586602 |
| 34            | 6             | 0           | 1.082223                | 4.175461  | -5.058212 |
| 35            | 1             | 0           | 0.361483                | 3.665690  | -5.704247 |
| 36            | 1             | 0           | 1.055578                | 5.241156  | -5.318934 |
| 37            | 1             | 0           | 2.080379                | 3.806453  | -5.311717 |
| 38            | 6             | 0           | -1.082223               | -4.175461 | 5.058212  |
| 39            | 1             | 0           | -1.055578               | -5.241156 | 5.318934  |
| 40            | 1             | 0           | -0.361483               | -3.665690 | 5.704247  |
| 41            | 1             | 0           | -2.080379               | -3.806453 | 5.311717  |
| 42            | 6             | 0           | -0.654835               | 4.555304  | -3.292450 |
| 43            | 1             | 0           | -0.918444               | 4.496158  | -2.233263 |
| 44            | 1             | 0           | -0.697332               | 5.612923  | -3.582823 |
| 45            | 1             | 0           | -1.427529               | 4.032272  | -3.864351 |
| 46            | 6             | 0           | 0.654835                | -4.555304 | 3.292450  |
| 47            | 1             | 0           | 0.697332                | -5.612923 | 3.582823  |
| 48            | 1             | 0           | 0.918444                | -4.496158 | 2.233263  |
| 49            | 1             | 0           | 1.427529                | -4.032272 | 3.864351  |
| 50            | 6             | 0           | -1.773623               | -4.784541 | 2.722621  |

59meso.txt

|    |   |   |           |           |           |
|----|---|---|-----------|-----------|-----------|
| 51 | 1 | 0 | -1.715864 | -5.852015 | 2.971044  |
| 52 | 1 | 0 | -2.801504 | -4.462306 | 2.911925  |
| 53 | 1 | 0 | -1.584950 | -4.686870 | 1.649769  |
| 54 | 6 | 0 | 1.773623  | 4.784541  | -2.722621 |
| 55 | 1 | 0 | 2.801504  | 4.462306  | -2.911925 |
| 56 | 1 | 0 | 1.715864  | 5.852015  | -2.971044 |
| 57 | 1 | 0 | 1.584950  | 4.686870  | -1.649769 |
| 58 | 6 | 0 | -2.273851 | 1.815719  | -1.510049 |
| 59 | 1 | 0 | -2.666985 | 2.836364  | -1.574533 |
| 60 | 1 | 0 | -2.150778 | 1.441275  | -2.524218 |
| 61 | 1 | 0 | -3.031721 | 1.202140  | -1.021049 |
| 62 | 6 | 0 | 2.273851  | -1.815719 | 1.510049  |
| 63 | 1 | 0 | 2.150778  | -1.441275 | 2.524218  |
| 64 | 1 | 0 | 2.666985  | -2.836364 | 1.574533  |
| 65 | 1 | 0 | 3.031721  | -1.202140 | 1.021049  |
| 66 | 6 | 0 | 2.235115  | -1.920206 | -1.539175 |
| 67 | 1 | 0 | 2.978090  | -1.170609 | -1.261717 |
| 68 | 1 | 0 | 2.696544  | -2.905560 | -1.408570 |
| 69 | 1 | 0 | 2.010006  | -1.800430 | -2.599845 |
| 70 | 6 | 0 | -2.235115 | 1.920206  | 1.539175  |
| 71 | 1 | 0 | -2.696544 | 2.905560  | 1.408570  |
| 72 | 1 | 0 | -2.978090 | 1.170609  | 1.261717  |
| 73 | 1 | 0 | -2.010006 | 1.800430  | 2.599845  |

-----

#### Fréquences

|                | 1        | 2       | 3       |
|----------------|----------|---------|---------|
|                | AG       | AU      | AU      |
| Frequencies -- | -35.6536 | -9.2172 | 22.9441 |
| Red. masses -- | 1.5586   | 3.9337  | 2.1931  |
| Frc consts --  | 0.0012   | 0.0002  | 0.0007  |
| IR Inten --    | 0.0000   | 0.2675  | 0.0170  |
|                | 4        | 5       | 6       |
|                | AG       | AU      | AU      |
| Frequencies -- | 32.5452  | 32.5655 | 38.1700 |
| Red. masses -- | 2.6293   | 2.2849  | 3.2392  |
| Frc consts --  | 0.0016   | 0.0014  | 0.0028  |
| IR Inten --    | 0.0000   | 0.0091  | 0.0569  |

NB: les fréquences imaginaires sont des rotations 1) des méthyles en béta et 2) des cycles phospholyles

#### Energie libre

|                                              |                             |
|----------------------------------------------|-----------------------------|
| Zero-point correction=                       | 0.617723 (Hartree/Particle) |
| Thermal correction to Energy=                | 0.657906                    |
| Thermal correction to Enthalpy=              | 0.658851                    |
| Thermal correction to Gibbs Free Energy=     | 0.548169                    |
| Sum of electronic and zero-point Energies=   | -2347.668017                |
| Sum of electronic and thermal Energies=      | -2347.627834                |
| Sum of electronic and thermal Enthalpies=    | -2347.626890                |
| Sum of electronic and thermal Free Energies= | -2347.737571                |

Molecule 2,2'-bisTBS-3,3',4,4'-tetraMe-1,1'-diphosphacobaltocene rac-2.

Software. Gaussian G03W

Functionnal B3LYP

Bases H/C/Si/P 6-311+g\*\*  
Co LANL2DZ

Calculation opt (scf=tight)  
Pop=full, nbo  
Freq

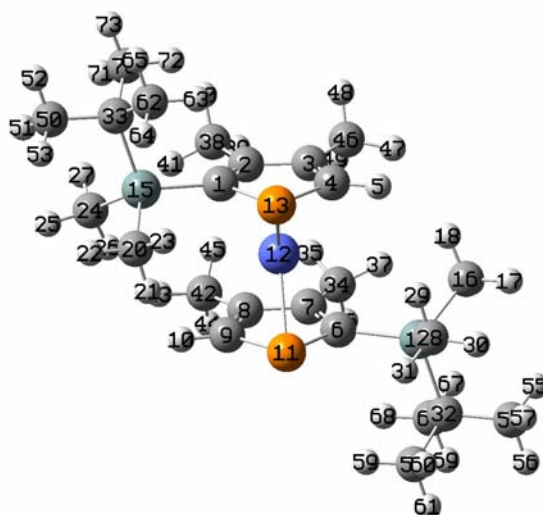

59rac.txt

Optimisation

| Item                 | Value    | Threshold | Converged? |
|----------------------|----------|-----------|------------|
| Maximum Force        | 0.000348 | 0.000450  | YES        |
| RMS Force            | 0.000092 | 0.000300  | YES        |
| Maximum Displacement | 0.001092 | 0.001800  | YES        |
| RMS Displacement     | 0.000251 | 0.001200  | YES        |

Predicted change in Energy=-3.467842D-04  
Optimization completed.  
-- Stationary point found.

Géométrie

Input orientation:

| Center Number | Atomic Number | Atomic Type | Coordinates (Angstroms) |           |           |
|---------------|---------------|-------------|-------------------------|-----------|-----------|
|               |               |             | X                       | Y         | Z         |
| 1             | 6             | 0           | 0.000000                | 2.277467  | -0.052841 |
| 2             | 6             | 0           | -0.475752               | 1.856831  | 1.213767  |
| 3             | 6             | 0           | -1.670037               | 1.021414  | 1.145537  |
| 4             | 6             | 0           | -2.078077               | 0.792038  | -0.172814 |
| 5             | 1             | 0           | -2.923097               | 0.159720  | -0.424441 |
| 6             | 6             | 0           | 0.000000                | -2.277467 | -0.052841 |
| 7             | 6             | 0           | 0.475752                | -1.856831 | 1.213767  |
| 8             | 6             | 0           | 1.670037                | -1.021414 | 1.145537  |
| 9             | 6             | 0           | 2.078077                | -0.792038 | -0.172814 |
| 10            | 1             | 0           | 2.923097                | -0.159720 | -0.424441 |
| 11            | 15            | 0           | 0.993800                | -1.542413 | -1.376441 |
| 12            | 27            | 0           | 0.000000                | 0.000000  | 0.118098  |
| 13            | 15            | 0           | -0.993800               | 1.542413  | -1.376441 |
| 14            | 14            | 0           | -1.429858               | -3.428023 | -0.507621 |
| 15            | 14            | 0           | 1.429858                | 3.428023  | -0.507621 |
| 16            | 6             | 0           | -2.922023               | -3.294522 | 0.666414  |
| 17            | 1             | 0           | -3.792436               | -3.776406 | 0.204306  |
| 18            | 1             | 0           | -3.188436               | -2.247637 | 0.850581  |
| 19            | 1             | 0           | -2.762481               | -3.776526 | 1.637292  |
| 20            | 6             | 0           | 2.043604                | 2.937623  | -2.234408 |
| 21            | 1             | 0           | 2.432841                | 1.912879  | -2.224744 |
| 22            | 1             | 0           | 2.854765                | 3.598242  | -2.564264 |
| 23            | 1             | 0           | 1.252797                | 2.976757  | -2.991119 |
| 24            | 6             | 0           | 2.922023                | 3.294522  | 0.666414  |
| 25            | 1             | 0           | 3.792436                | 3.776406  | 0.204306  |
| 26            | 1             | 0           | 3.188436                | 2.247637  | 0.850581  |
| 27            | 1             | 0           | 2.762481                | 3.776526  | 1.637292  |
| 28            | 6             | 0           | -2.043604               | -2.937623 | -2.234408 |
| 29            | 1             | 0           | -2.432841               | -1.912879 | -2.224744 |
| 30            | 1             | 0           | -2.854765               | -3.598242 | -2.564264 |
| 31            | 1             | 0           | -1.252797               | -2.976757 | -2.991119 |
| 32            | 6             | 0           | -0.810021               | -5.260984 | -0.533241 |
| 33            | 6             | 0           | 0.810021                | 5.260984  | -0.533241 |
| 34            | 6             | 0           | -0.086723               | -2.294852 | 2.544830  |
| 35            | 1             | 0           | 0.107507                | -1.557701 | 3.330092  |
| 36            | 1             | 0           | 0.377307                | -3.236407 | 2.868247  |
| 37            | 1             | 0           | -1.164443               | -2.458826 | 2.497682  |
| 38            | 6             | 0           | 0.086723                | 2.294852  | 2.544830  |
| 39            | 1             | 0           | -0.107507               | 1.557701  | 3.330092  |
| 40            | 1             | 0           | -0.377307               | 3.236407  | 2.868247  |
| 41            | 1             | 0           | 1.164443                | 2.458826  | 2.497682  |
| 42            | 6             | 0           | 2.429486                | -0.544245 | 2.357370  |
| 43            | 1             | 0           | 3.209922                | 0.166835  | 2.071637  |
| 44            | 1             | 0           | 2.919087                | -1.386119 | 2.865154  |
| 45            | 1             | 0           | 1.784474                | -0.053530 | 3.093252  |
| 46            | 6             | 0           | -2.429486               | 0.544245  | 2.357370  |
| 47            | 1             | 0           | -3.209922               | -0.166835 | 2.071637  |
| 48            | 1             | 0           | -2.919087               | 1.386119  | 2.865154  |
| 49            | 1             | 0           | -1.784474               | 0.053530  | 3.093252  |
| 50            | 6             | 0           | 1.996805                | 6.206184  | -0.824714 |

59rac.txt

|    |   |   |           |           |           |
|----|---|---|-----------|-----------|-----------|
| 51 | 1 | 0 | 2.774258  | 6.142692  | -0.053695 |
| 52 | 1 | 0 | 1.653743  | 7.251011  | -0.855028 |
| 53 | 1 | 0 | 2.466806  | 5.992343  | -1.792664 |
| 54 | 6 | 0 | -1.996805 | -6.206184 | -0.824714 |
| 55 | 1 | 0 | -2.774258 | -6.142692 | -0.053695 |
| 56 | 1 | 0 | -1.653743 | -7.251011 | -0.855028 |
| 57 | 1 | 0 | -2.466806 | -5.992343 | -1.792664 |
| 58 | 6 | 0 | 0.259077  | -5.452003 | -1.629932 |
| 59 | 1 | 0 | 1.129242  | -4.803967 | -1.471140 |
| 60 | 1 | 0 | -0.135814 | -5.239580 | -2.630644 |
| 61 | 1 | 0 | 0.619445  | -6.491469 | -1.635502 |
| 62 | 6 | 0 | -0.259077 | 5.452003  | -1.629932 |
| 63 | 1 | 0 | -1.129242 | 4.803967  | -1.471140 |
| 64 | 1 | 0 | 0.135814  | 5.239580  | -2.630644 |
| 65 | 1 | 0 | -0.619445 | 6.491469  | -1.635502 |
| 66 | 6 | 0 | -0.192927 | -5.643515 | 0.828408  |
| 67 | 1 | 0 | -0.908476 | -5.535812 | 1.653492  |
| 68 | 1 | 0 | 0.684896  | -5.028743 | 1.060551  |
| 69 | 1 | 0 | 0.135201  | -6.693540 | 0.819699  |
| 70 | 6 | 0 | 0.192927  | 5.643515  | 0.828408  |
| 71 | 1 | 0 | 0.908476  | 5.535812  | 1.653492  |
| 72 | 1 | 0 | -0.684896 | 5.028743  | 1.060551  |
| 73 | 1 | 0 | -0.135201 | 6.693540  | 0.819699  |

---

#### Fréquences

|                | 1       | 2       | 3       |
|----------------|---------|---------|---------|
|                | A       | A       | B       |
| Frequencies -- | 10.9965 | 18.9619 | 22.9851 |
| Red. masses -- | 4.4987  | 2.7492  | 2.8636  |
| Frc consts --  | 0.0003  | 0.0006  | 0.0009  |
| IR Inten --    | 0.0002  | 0.0043  | 0.0942  |
|                | 4       | 5       | 6       |
|                | B       | A       | B       |
| Frequencies -- | 30.3266 | 35.1023 | 38.5179 |
| Red. masses -- | 3.8576  | 3.2403  | 4.0725  |
| Frc consts --  | 0.0021  | 0.0024  | 0.0036  |
| IR Inten --    | 0.0324  | 0.0025  | 0.1462  |

#### Energie libre

|                                              |                             |
|----------------------------------------------|-----------------------------|
| Zero-point correction=                       | 0.617398 (Hartree/Particle) |
| Thermal correction to Energy=                | 0.658658                    |
| Thermal correction to Enthalpy=              | 0.659602                    |
| Thermal correction to Gibbs Free Energy=     | 0.546238                    |
| Sum of electronic and zero-point Energies=   | -2347.668721                |
| Sum of electronic and thermal Energies=      | -2347.627461                |
| Sum of electronic and thermal Enthalpies=    | -2347.626517                |
| Sum of electronic and thermal Free Energies= | -2347.739881                |
